# Supplementary material for: Isolation and Characterization of <em>Erianthus arundinaceus </em>Phosphate Transporter 1 (PHT1) Gene Promoter and 5′ Deletion Analysis of Transcriptional Regulation Regions under Phosphate Stress in Transgenic Tobacco
Source: Preprints.org preprint supplement (doi:10.20944/preprints202310.0262.v1), 2023-10-05
Supplement: Supplementary file 1 [file supplementary]

**Supplementary file**

**
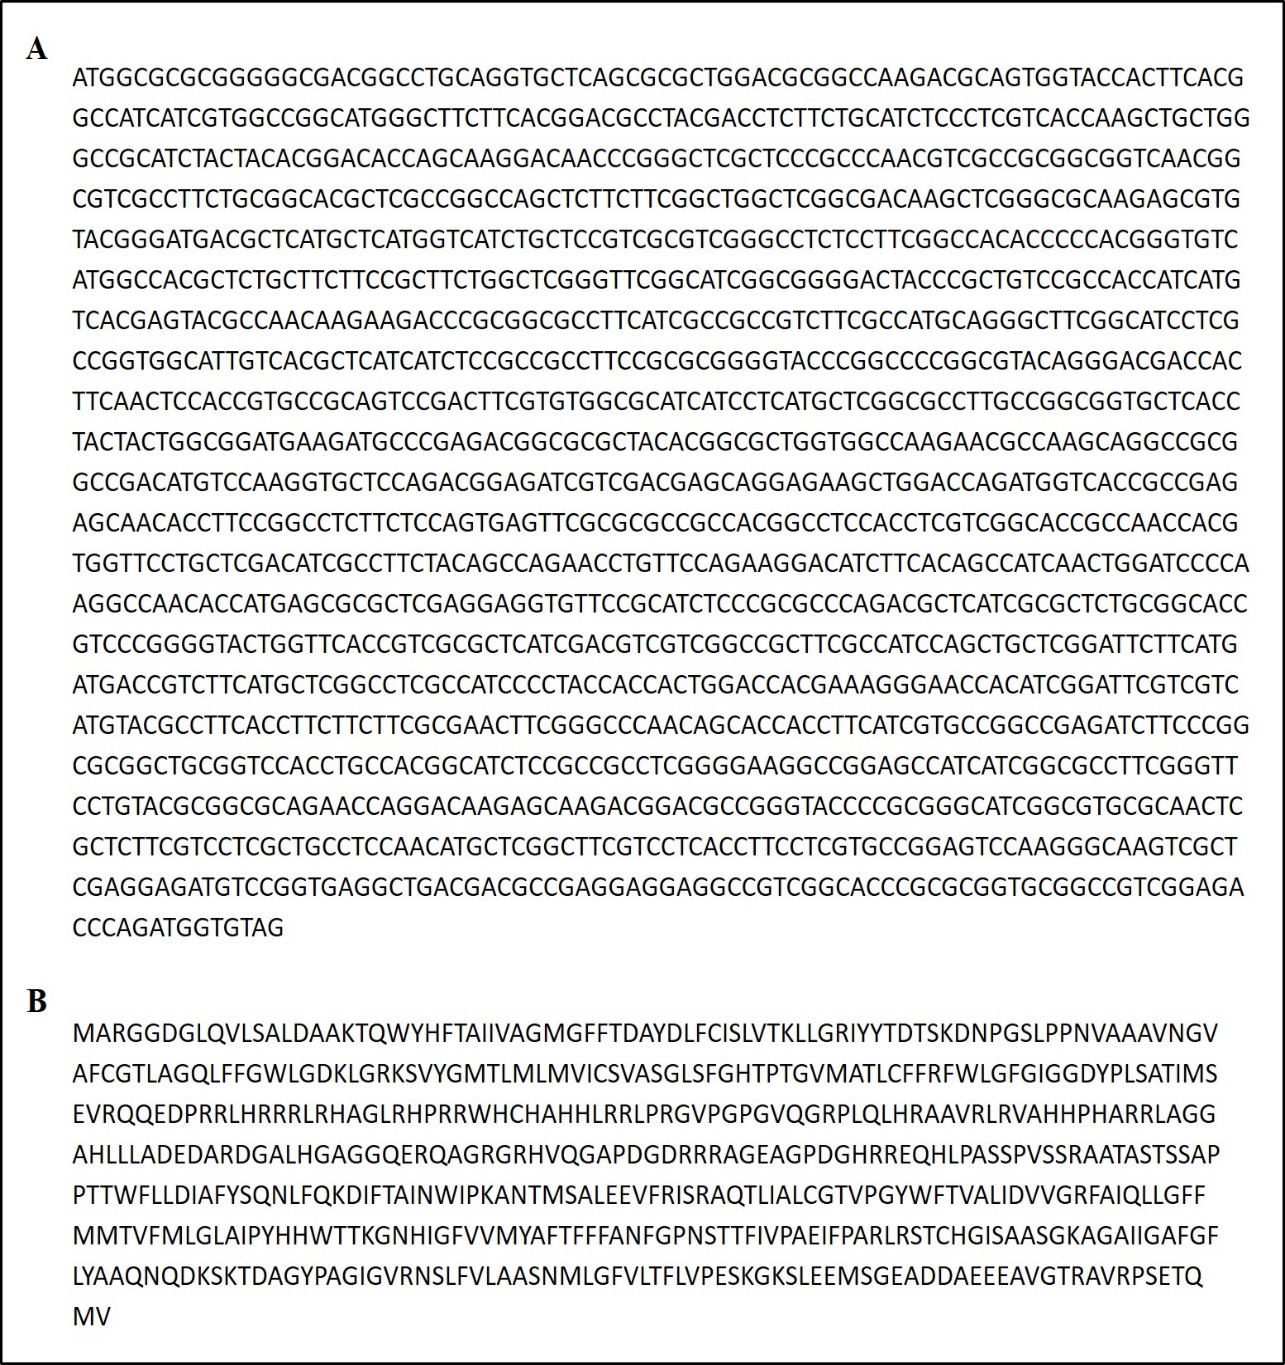
**

Figure S1. The nucleotide sequence of *Erianthus arundinaceus* Phosphate transporter 1;2 (EaPHT1;2). (A) The full-length CDS sequence of the EaPHT1;2 gene; (B) The ExPasy-translated protein sequence of the EaPHT1;2.

Figure S2: Physicochemical parameters of the selected protein: (A) Atomic composition of EaPHT1;2 protein, (B) Amino acid composition of EaPHT1;2 protein

Figure S3: Post-translation modification sites of EaPHT1. (A) Phosphorylation sites. (B) Glycosylation site. The amino acids are represented in different lines at their position in the sequence and the scores higher than the threshold value are considered for posttranslational modification.

Figure S4: Protein structure prediction and evaluation. (A) Secondary elements in the EaPHT1 protein predicted using the SOPMA tool. (B) Structural evaluation of EaPHT1;2 obtained through Phyre2 model; (B) EaPHT1;2 obtained through Swiss-Modelling.

Figure S5: Protein-protein Interaction analysis of EaPHT1;2 protein. (A) PPI of EaPHT1;2 with ZmPHT1 protein. (B) PPI of EaPHT1;2 with AtPHT protein. (C) PPI of EaPHT1;2 with SbPHT protein.

.

Figure S6: Subcellular Localization analysis (A) EaPHT1;2 protein localization using online tools DeepLoc analysis (B) QuickGo Term analysis of EaPHT1;2 protein


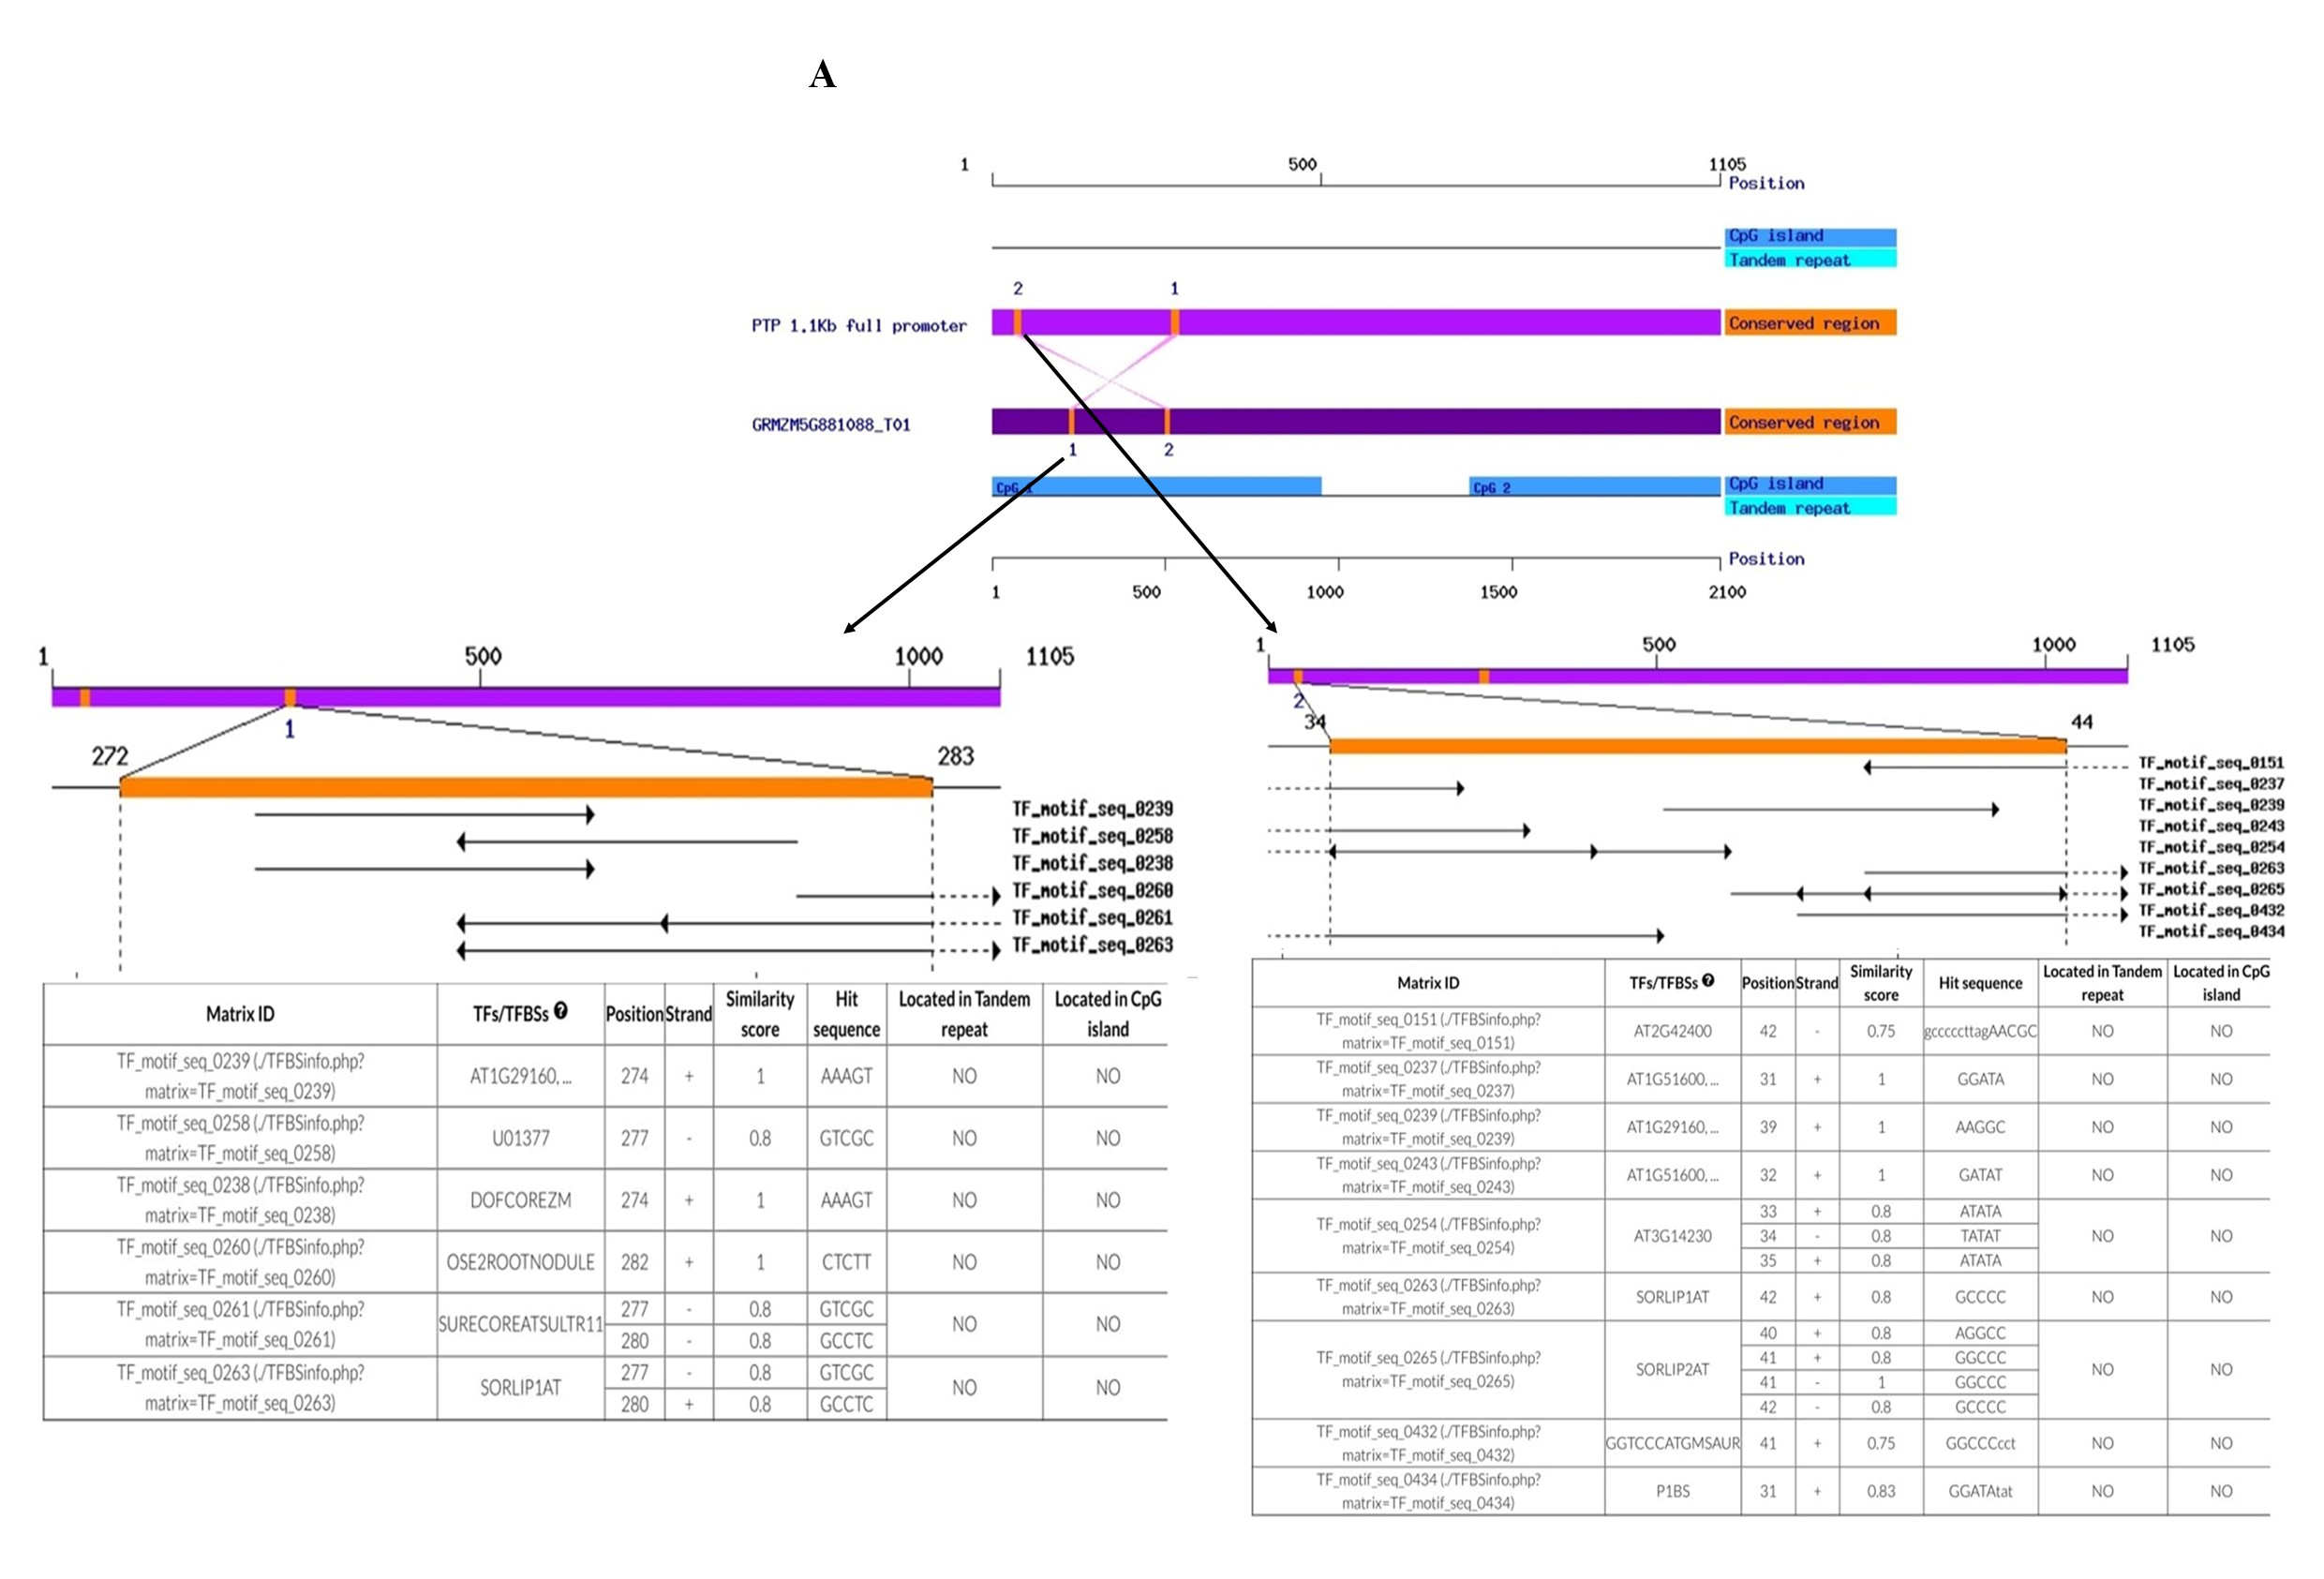


Figure S7: Comparative In-silico analysis of EaPHT1;2 promoter. (A) The EaPHT1;2 promoter conserved regions awith ZmPHT1 and (B) One conserved region was ShPHT1;2 promoter regions.


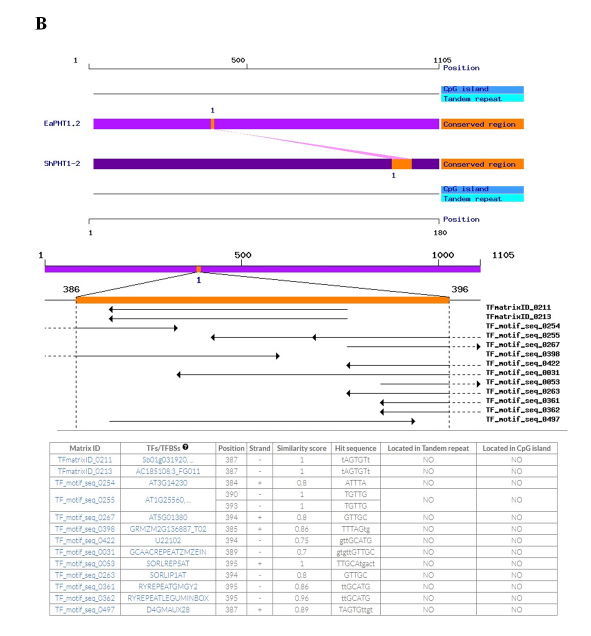
Figure S8: Comparative In-silico analysis of EaPHT1;2 promoter. (A) The EaPHT1;2 promoter conserved regions awith ZmPHT1 and (B) One conserved region was ShPHT1;2 promoter regions.

Table S1: List of primer sequences used in this study for EaPHT1-2 gene isolation, promoter isolation, promoter deletion constructs, and analysis.

| **Primers** | **Name** | **Primer sequence** |
| --- | --- | --- |
| Gene Isolation Primer | GPHT1F | ATGGCGCGCGGCGGGGACGGCCTGCA |
| GPHT1R | CTACACCATCTGGGTCCCCGACGGC |
| Primary PCR Primer | ASP I | GGATCCTAATACGACTCACTATAGGGC |
| pPHT R1 | TAGTAGATGCGGCCGAGCAGC |
| Secondary PCR Primer | ASP II | AATAGGGCTCGAGCGGC |
| pPHT R2 | CCCATGCCGGCGATGACGATG |
| Promoter-specific primers | pFL F | CGCAAGCTTAAGGCCCCCTTAGAACGCG |
| pFL R | TAAACCATGGGGTCGCTGCACC |
| GUS-specific Primers | GUS F | GGAATGGTGATTACCGACG |
| GUSR | ATACCTGTTCACCGACGACG |
| Deletion Primers  (For all deletion Reverse primer is the same) | EaPHT-pD1 F | CGCAAGCTTAGTGTTGTTGCATGACTG |
| EaPHT-pD2 F | CGCAAGCTTAGCATCTCCATCTAACCACCA |
| EaPHT-pD3 F | CGCAAGCTTAAGGCCCCCTTAGAACGCG |
| EaPHT-pD4 F | CGCAAGCTTAGTGTTGTTGCATGACTG |
| EaPHT-pD5 F | CGCAAGCTTAGCATCTCCATCTAACCACCA |
| pFL R | TAAACCATGGGGTCGCTGCACC |

Table S2: Physicochemical characteristics of the EaPHT1;2 protein

| **Properties** | **Value** |
| --- | --- |
| No. of amino acids | 542 |
| Molecular weight | 58940.73 |
| Theoretical pI | 9.8 |
| No. of negatively charged residues (Asp + Glu) | 38 |
| No. of positively charged residues (Arg + Lys) | 55 |
| Total number of atoms | 8262 |
| Extinction Coefficient (all pairs of Cys residues form cysteines) | 62255 |
| Extinction Coefficient (all Cys residues are reduced) | 61880 |
| Half-life (in vitro) (h) | 30 |
| Instability index (II) | 43.1 |
| Aliphatic index | 82.71 |
| Grand average of hydropathicity | 0.019 |

Table S3: Subcellular localization of EaPHT1-2 gene in different locations

| **Localization** | **Likelihood** |
| --- | --- |
| Cell membrane | 0.3897 |
| Lysosome/Vacuole | 0.31 |
| Endoplasmic reticulum | 0.2102 |
| Golgi apparatus | 0.083 |
| Mitochondrion | 0.0063 |
| Peroxisome | 0.0005 |
| Plastid | 0.0002 |
| Nucleus | 0.0001 |
| Extracellular | 0 |
| Cytoplasm | 0 |
